# Supplementary figures and images for: Improving the solubility and bioavailability of anti-hepatitis B drug PEC via PEC–fumaric acid cocrystal
Source: Royal Society of Chemistry journal article supplement (doi:10.1039/d0ra06608g), 2020-01-01

分析人员  
日期

ligaoping  
2020年6月30日 8:50

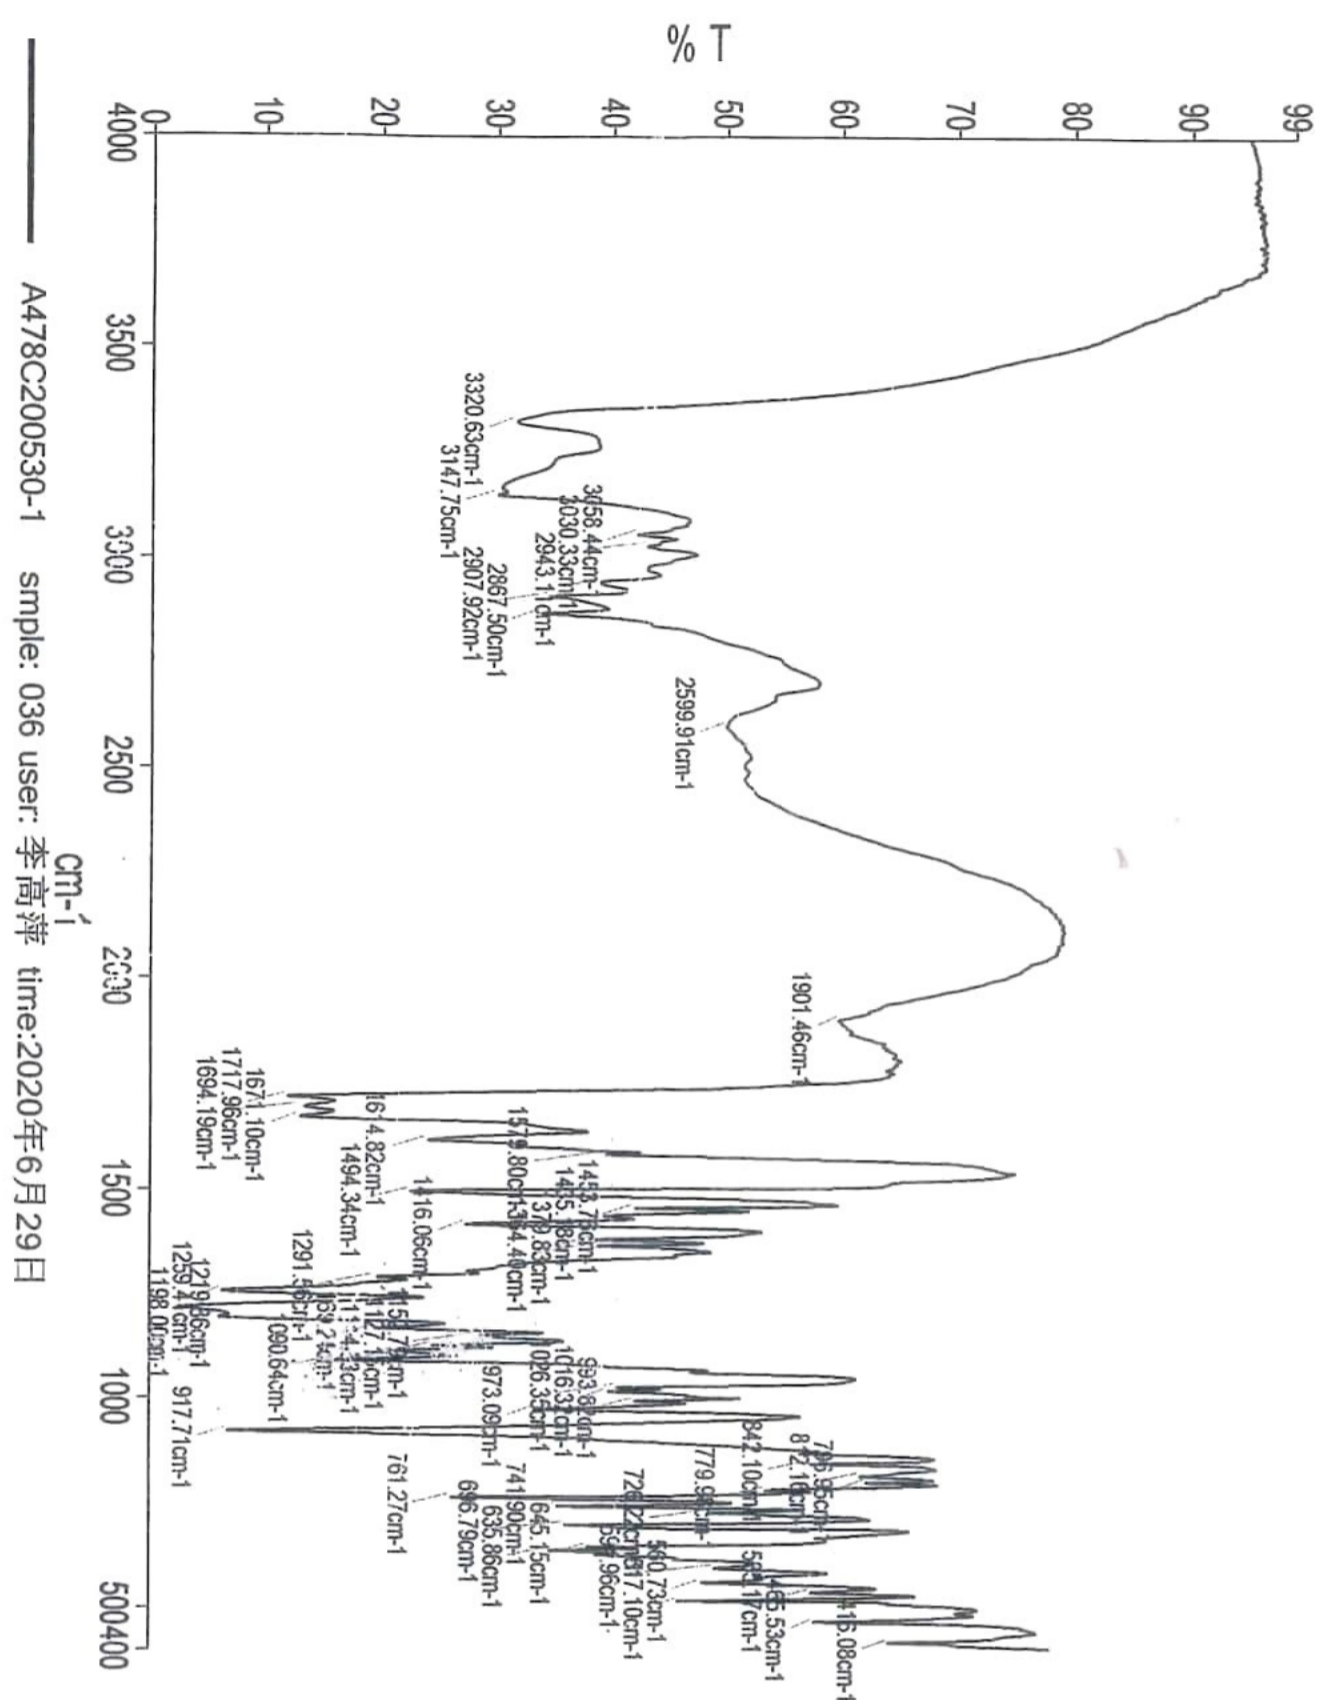

Supplement: d0ra06608g1.pdf [file d0ra06608g1.pdf]
